# Supplementary figures and images for: Severe Sporotrichosis Treated with Amphotericin B: A 20-Year Cohort Study in an Endemic Area of Zoonotic Transmission
Source: MDPI journal article supplement (doi:10.3390/jof8050469), 2022-04-30

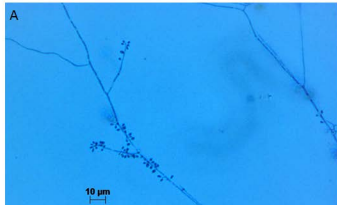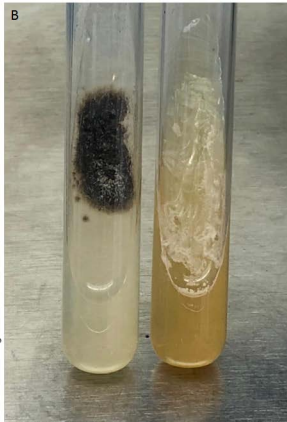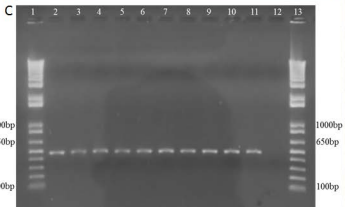

Supplement: s1 [file s1]
